# Supplementary material for: Enhanced electrochemical capacitive performance of “sandwich-like” MWCNTs/PANI/PSS-GR electrode materials
Source: Royal Society of Chemistry journal article supplement (doi:10.1039/c6ra20435j), 2016-01-01
Supplement: c6ra20435j1.pdf [file c6ra20435j1.pdf]

## Supplementary Informantion

### Enhanced electrochemical capacitive performance of “sandwich-like” MWCNTs/PANI/PSS-GR electrode material

Ranran Zhang, Jun Qian <sup>\*</sup>, Shuangli Ye, Yihua Zhou, Ziqiang Zhu

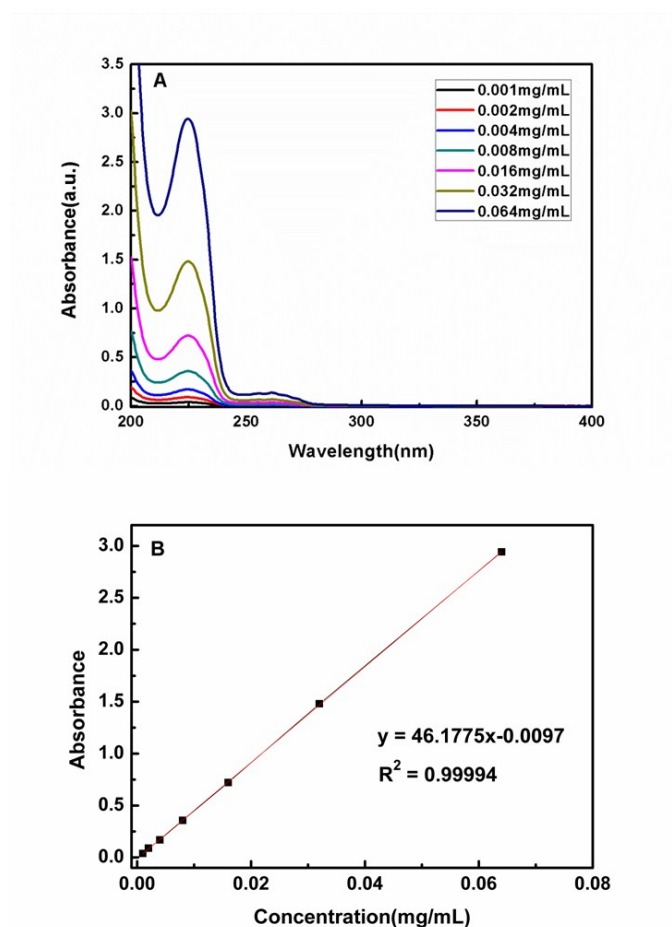

**Fig. S1** UV-vis spectra of PSS with different concentrations (A) and calibration curve of PSS (B)

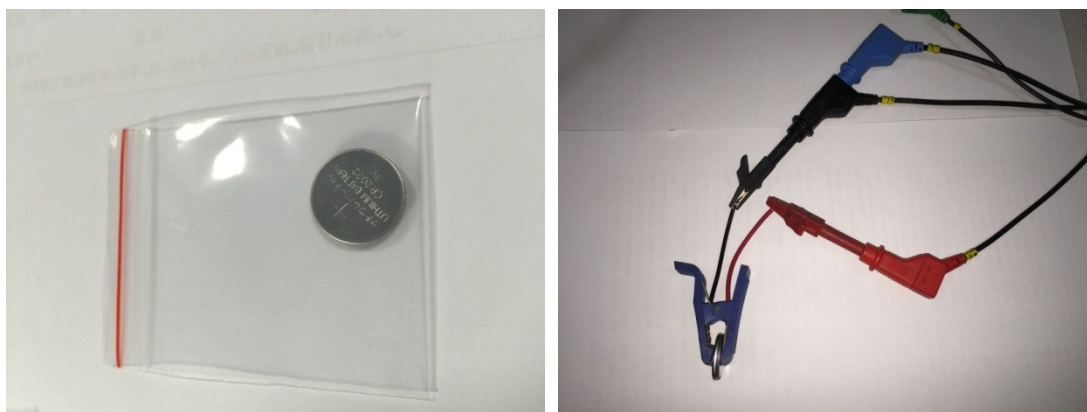

**Fig. S2 Photographs of a two-electrode cell**

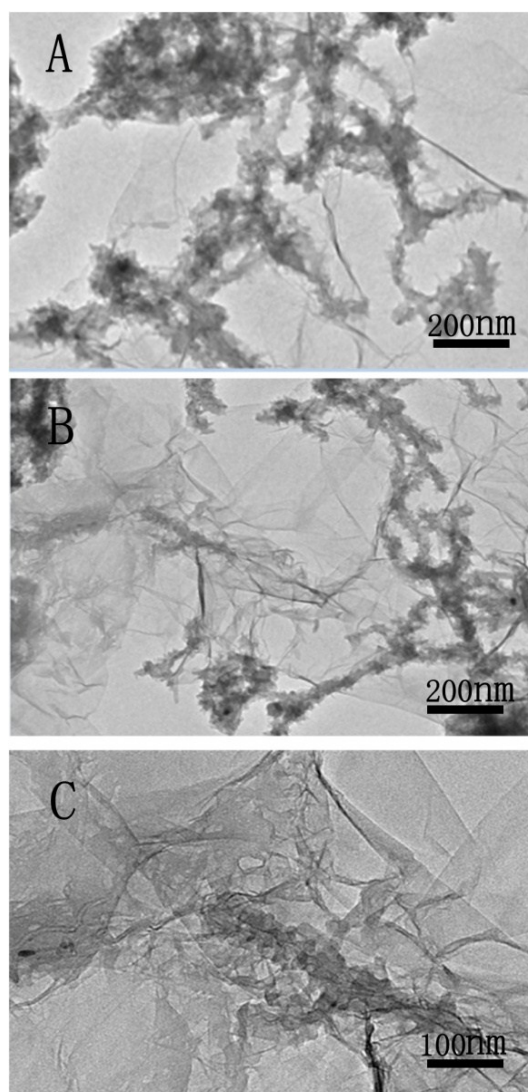

**Fig.S3 The TEM images of MPG10 (A), MPG20 (B) and MPG30 (C)**

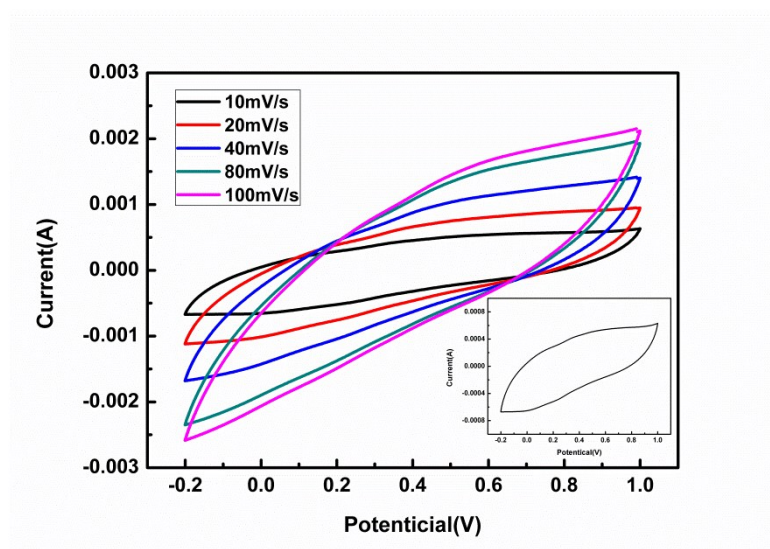

**Fig. S4 CV curves of MPG20 at different scan rates, the inset is the CV curve at 10 mV/s (two-electrode system)**

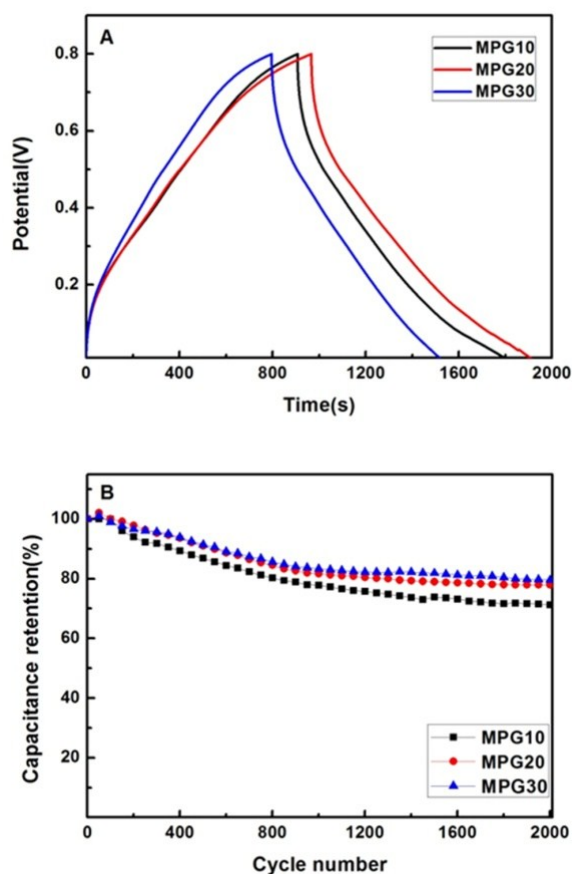

**Fig. S5 GCD curves of MPG10, MPG20 and MPG30 at the current density of 0.5A g<sup>-1</sup> (A); Cycling stability of MPG10, MPG20 and MPG30 at the current density of 1A g<sup>-1</sup> in 1M H<sub>2</sub>SO<sub>4</sub> (B) ( three-electrode system)**

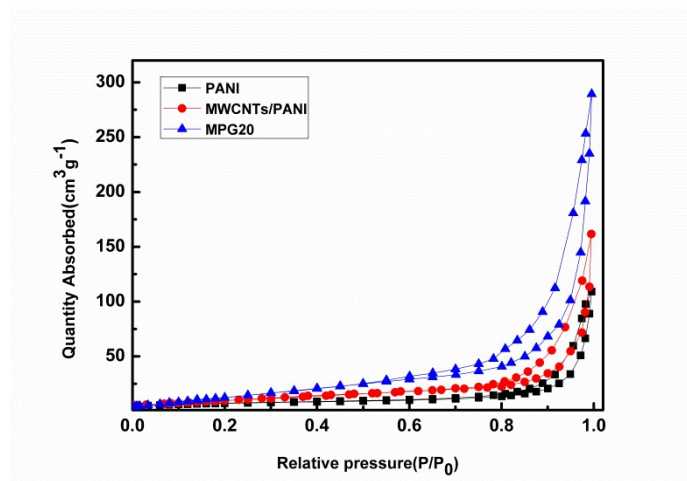

**Fig.S6 N<sub>2</sub> adsorption-desorption isotherms of the PANI, MWCNTs/PANI and MPG20**

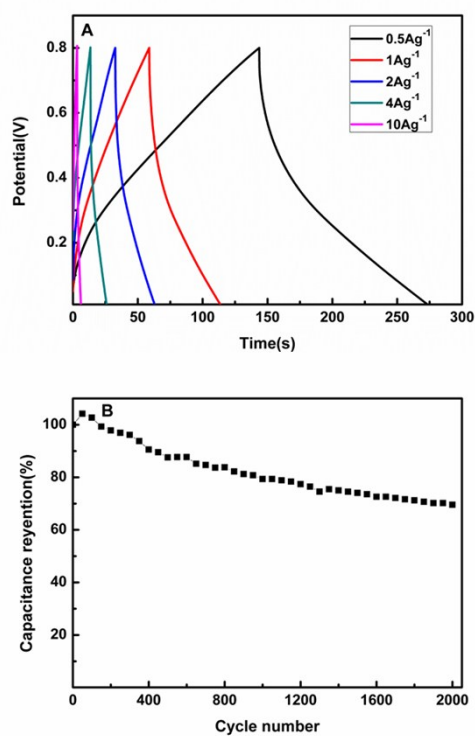

**Fig. S7 GCD curves of MPG20 at different current density (A); Cycling stability of MPG20 at the current density of 1  $\text{Ag}^{-1}$  (B) (two-electrode system)**
